# Supplementary material for: Flower litters of alpine plants affect soil nitrogen and phosphorus rapidly in the eastern Tibetan Plateau
Source: Copernicus journal article supplement (doi:10.5194/bg-2016-68), 2016-04-15
Supplement: Supplementary file [file bg-2016-68-AC1-supplement.pdf]

1 **Title Page**

2 **TITLE:**

3 Flower litters of alpine plants affect soil nitrogen and phosphorus rapidly in the eastern Tibetan Plateau

4  
5 **AUTHORS:**

6 Jinniu Wang<sup>1,2</sup>

7 1. Chengdu Institute of Biology, Chinese Academy of Sciences/Key Laboratory of Mountain  
8 Ecological Restoration and Bioresource Utilization, Chinese Academy of Sciences/Ecological  
9 Restoration Biodiversity Conservation Key Laboratory of Sichuan Province, Chengdu 610041, China

10 2. International Centre for Integrated Mountain Development (ICIMOD), G.P.O. Box 3226, Kathmandu,  
11 Nepal

12  
13 Bo Xu<sup>1,3</sup>

14 1. Chengdu Institute of Biology, Chinese Academy of Sciences/Key Laboratory of Mountain  
15 Ecological Restoration and Bioresource Utilization, Chinese Academy of Sciences/Ecological  
16 Restoration Biodiversity Conservation Key Laboratory of Sichuan Province, Chengdu 610041, China

17 3. University of Chinese Academy Sciences, Beijing 100049, China

18  
19 Yan Wu<sup>1</sup>

20 1. Chengdu Institute of Biology, Chinese Academy of Sciences/Key Laboratory of Mountain  
21 Ecological Restoration and Bioresource Utilization, Chinese Academy of Sciences/Ecological  
22 Restoration Biodiversity Conservation Key Laboratory of Sichuan Province, Chengdu 610041, China

23  
24 Jing Gao<sup>1,3</sup>

25 1. Chengdu Institute of Biology, Chinese Academy of Sciences/Key Laboratory of Mountain  
26 Ecological Restoration and Bioresource Utilization, Chinese Academy of Sciences/Ecological  
27 Restoration Biodiversity Conservation Key Laboratory of Sichuan Province, Chengdu 610041, China

28 3. University of Chinese Academy Sciences, Beijing 100049, China

29  
30 Fusun Shi (corresponding author)

31 Chengdu Institute of Biology, Chinese Academy of Sciences/Key Laboratory of Mountain Ecological  
32 Restoration and Bioresource Utilization, Chinese Academy of Sciences/Ecological Restoration  
33 Biodiversity Conservation Key Laboratory of Sichuan Province, Chengdu 610041, China

34 Email: [shifs@cib.ac.cn](mailto:shifs@cib.ac.cn)

35 Tel: +86-28-82890537

36 Fax: +86-28-82890288

37

38

39 **Flower Litters of Alpine Plants Rapidly Affect Soil Nitrogen and**  
40 **Phosphorus in the Eastern Tibetan Plateau**

41 **Abstract**

42 Litters of reproductive organs have been rarely studied, despite their role in allocating  
43 nutrients for offspring reproduction. This study determines the mechanism through  
44 which flower litters efficiently increase the available soil nutrient pool. Field  
45 experiments were conducted to collect plant litters and calculate biomass production  
46 in an alpine meadow of the eastern Tibetan Plateau. Carbon, nitrogen, phosphorus,  
47 lignin, cellulose, and their relevant ratios of litters were analyzed to identify their  
48 decomposition features. A pot experiment was performed to determine the effects of  
49 litter addition on soil nutrition pool by comparison between the treated and control  
50 samples. Litter-bag method was used to verify decomposition rates. The flower litters  
51 of phanerophyte plants were comparable with non-flower litters. Biomass partitioning  
52 of other herbaceous species accounted for 10%–40% of the aboveground biomass.  
53 Flower litter possessed significantly higher N and P levels but less C/N, N/P, lignin/N,  
54 and lignin and cellulose concentrations than leaf litter. Flower litter fed soil nutrition  
55 pool more efficiently because of their faster decomposition rate and higher nutrient  
56 contents. Litter-bag experiment confirmed that the flower litters of *Rhododendron*  
57 *przewalskii* and *Meconopsis integrifolia* decomposes approximately three times faster  
58 than mixed litters within 50 days. Moreover, the findings of the pot experiment  
59 indicated that flower litter addition significantly increased the available nutrient pool.  
60 Flower litter influenced nutrition cycling in alpine ecosystems, as evident by its  
61 non-ignorable production and significantly faster decomposition. The underlying  
62 mechanism can enrich nutrients, which return to the soil, and non-structural  
63 carbohydrates, which feed and enhance the transitions of soil microorganisms.

64 **Key words** alpine ecosystem, flower litter, chemical property, decomposition rate,  
65 nitrogen, phosphorus

66

67 The growth and health of plants in their life history have been considerably influenced  
68 by variations in the physical, chemical, and biological properties of soil, particularly  
69 around the rhizosphere, although soil properties can also be mediated by plants. Plant  
70 properties directly affect the productivity and function of an ecosystem (Chapin et al.,  
71 1986; Chapin, 2003; Berendse and Aerts, 1987; Grime, 1998). In a natural  
72 environment, plants continuously lose N and P in their whole life history and even  
73 during litter production and decomposition (Laungani and Knops, 2009; Richardson  
74 et al., 2009). N is a major constituent of several important plant substances (Vitousek  
75 and Howarth, 1991). Most plants absorb N through soil compounds to support their  
76 growth. The plant residue is one principal component of soil organic matter, whose  
77 decomposition can supply available N to plants and microorganisms. Similar to  
78 nitrogen, P is closely associated with numerous vital plant processes. Nevertheless, in  
79 most circumstances, P is limited because of its small concentration in soil; this  
80 element is released slowly from insoluble P but is highly demanded by plants and  
81 microorganisms (Bieleski, 1973; Richardson et al., 2009). As decomposition is a  
82 prolonged process, plants contain concentrated nutrients comparable with soil, which  
83 have significant effects on the biogeochemical cycle and feedbacks of plant–soil  
84 interaction. However, these nutrients cannot be simply absorbed again to the soil  
85 nutrient pool supplied by plants and microorganisms (Bieleski, 1973; Berendse and  
86 Aerts, 1987).

87 In cold life zone ecosystems, plant biomass production is limited by N (Körner,  
88 2003). Litter tends to be recalcitrant in cold environments (Aerts, 1997). In addition,  
89 N is a key factor that determines the outcome of interspecific competition in  
90 temperate-zone ecosystems (Laungani and Knops, 2009). Several studies reported that  
91 litter can mediate the interactions between neighboring plants in infertile communities  
92 (Nilsson et al., 1999, Xiong and Nilsson, 1999). In a succulent desert ecosystem in  
93 Africa, fertile islands are formed in nutrient enrichment zones beneath shrubs; this  
94 formation is attributed to a range of interactions between physical and biotic  
95 concentrating mechanisms (Stock et al., 1999). In China, an experiment performed in  
96 an alpine meadow ecosystem, the eastern Tibetan Plateau, indicated that soil N

97 availability and supply rates, as well as microbial biomass, can be enhanced by  
98 *Stellera chamaejasme* L., which is an unpalatable poisonous weed that seriously  
99 deteriorated the local rangeland (Sun et al., 2009). Another study in the gully region  
100 of the Loess Plateau demonstrated that black locust improves most soil properties  
101 (Qiu et al., 2010). Plants enhance the microbial immobilization of N when they  
102 provide C to soil microorganisms. The nature of litter determines its palatability to  
103 soil organisms, thereby influencing their composition and activity levels. Furthermore,  
104 a few apparent effects of N may be caused by the low levels of polyphenols, which is  
105 associated with high N concentrations in litter (Haynes 1986). The rate of decay and  
106 concentrations of nutrients in the litter determine the rate of nutrient release, which  
107 creates a positive feedback to site fertility. Hence, the chemical properties of litters  
108 from different plant organs and their correlations with decomposition rate must be  
109 determined.

110 Although inflorescences comprise only a small fraction of plant biomass and  
111 production in Arctic and alpine vegetation, the inflorescence production can be a  
112 significant proportion of the total production of species under certain special  
113 circumstances (Mart ínez-Yr izar et al., 1999, Fabbro and Körner, 2004; Wookey et al.,  
114 2009). Reproductive tissues present chemical composition that differs from vegetative  
115 parts, resulting in a markedly faster decomposition and nutrient release, with  
116 repercussions on nutrient cycling and patchiness (Buxton and Marten, 1989; Lee et al.,  
117 2011). High contents of N and P exist in the reproductive organs of plants probably  
118 because of their essential roles in plant growth and formation (e.g., high protein  
119 content). Alpine ecosystems are thermally restricted and characterized by a low  
120 material turnover rate (Körner, 2003). In a high altitude region, plants grow in a harsh  
121 habitat that restricted their effective utilization of resources; in this regard, the total  
122 available resource is less compared with that of plants in other regions (Fabbro and  
123 Körner, 2004; Hautier et al., 2009). In long-term evolution, the allocation of  
124 accumulated carbohydrates to reproduction is an adaptation strategy, leading to the  
125 partitioning of reproductive organs, that is, the availability and timely mobilization of  
126 adequate resources from the vegetative plant body to reproductive structures (Arroyo

127 et al., 2013). Thus far, probably due to reproductive organs' comparatively minor  
128 biomass production and difficult to be collected, studies on their decomposition have  
129 been limited particularly compared with those on leaf and other vegetative organs.

130 A fast decay of N-rich litters suggests that litter decay rates increase with increasing N  
131 content. The initial rate of nutrient release is positively correlated with the initial  
132 concentrations of N or P (MacLean and Wein, 1978; Aber and Melillo, 1980; Berg  
133 and Ekbohm, 1983; Yavitt and Fahey, 1986; Stohlgren, 1988). In agricultural systems,  
134 addition of fresh residues can stimulate the decomposition and net release of N from  
135 indigenous soil organic matter (Haynes, 1986; Scott et al., 1996). Long-term increases  
136 in N availability have also been reported following the additions of C to forests  
137 (Groffman, 1999). Recently, a common-garden decomposition experiment in a wide  
138 range of subarctic plant types demonstrated that structural and chemical traits are  
139 better predictors for several high-turnover organs than structural traits alone (Freschet  
140 et al., 2012). Decomposition rate of plant litters slightly differ because of their  
141 species-specific traits and various organs, whose chemical qualities vary in a wide  
142 range of plant types and environments. Thus, field investigation, pot experiment of  
143 litter addition, and litter-bag experiment were conducted in this study to address the  
144 following:

- 145 1) Should decomposition of flower litter be considered according to inflorescence  
146 biomass production, and/or allocation?
- 147 2) What are the unique chemical properties of flower litters that influence their faster  
148 decomposition rate compared with leaf litters?
- 149 3) Is pulsed effect evident on soil available N and P particularly in special temporal  
150 period and spatial location as determined through pot experiment?

## 151 **Materials and Methods**

### 152 *Study area*

153 The field site is located at the foot of Mt. KaKa, which belongs to the middle  
154 section of Minshan Mountain, eastern Tibetan Plateau (**Fig. 1**), with a mean annual  
155 precipitation of 720 mm. More than 70% of precipitation falls in summer from June to  
156 August. Snowfall usually occurs from the end of September to the next early May.

157 Vegetation presents a typical alpine meadow with numerous and unique alpine plants.  
158 Mosses are abundant and cover most of the ground. The moss layer is dominated by  
159 *Polytrichum swartzii* and *Trematodon acutus* c. mull. Vascular plants include species  
160 mainly belonging to genus *Kobresia* and genus *Carex*. Other common species are  
161 *Festuca* spp., *Gentiana* spp., and *Leontopodium* spp.. Plant roots in this ecosystem are  
162 generally confined to the surface A-horizon (2–20 cm). A few dwarf shrubs are  
163 scattered sporadically in the meadow, e.g., *Rhododendron* and *Salix*. The soil type is  
164 dominated by Mat Cry-gelic Cambisols (i.e., silty loam inceptisol, *Chinese Soil*  
165 *Taxonomy Research Group*, 1995).

#### 166 *Plant and soil sampling*

167 During the blooming period from the end of May until mid-June and from the end of  
168 July until early August, flower litters of 14 earlier flowering plants species and 15  
169 later flowering plants species were carefully collected in 2012 at two sites, namely,  
170 Mt. KAKA (103°42' E; 32°59' N, 3500–3900 m a.s.l.) and Bow Ridge Mountain  
171 (103°42' E; 33°1' N, 3600–3850 m a.s.l.). In the study, 4 litter traps were placed under  
172 the crown of each individual shrub, which were processed and modified based on the  
173 litterfall monitoring protocol (Muller-Landau and Wright, 2010). The litter trap was  
174 composed of 1 cloth bag and 4 support legs. Window screen (with a mesh size of 0.8  
175 mm) was used to seize the cloth bag. Its size was about 50 cm deep and 25 cm length  
176 of a side. 4 legs (made by 80 cm PVC pipe) were tied with cloth bag and frame. The  
177 frame of opening was made of iron wire with 3 mm diameter. After inserting it into  
178 the soil under the shrub's crown, the plant litter was collected twice per week, which  
179 was later sorted as flower litter and other types during the blooming period. Due to the  
180 small size of herbaceous individuals, flowers were just plucked at the end of  
181 flowering phase and their mass ratios to aboveground biomass were calculated.  
182 Freshly fallen leaves of different species were collected from the floor of the alpine  
183 meadow (i.e. mixed leaf litters, ca. 3950 m a.s.l.). These species were tentatively  
184 classified into five groups according to Raunkiaer's life-form system (i.e.,  
185 chamephyte, geophyte, hemicryptophyte, phanerophyte, and therophyte). These  
186 species were divided into earlier flowering species and later flowering species two

187 groups based on blooming time. According to Raunkiaer's life-form system, earlier  
188 flowering species mainly consisted of hemicryptophyte, geophyte, and phanerophyte,  
189 whereas more than half of later flowering species comprised chamaephyte. Nearly  
190 half of the tested species were dominant or co-dominant in their respective  
191 communities. The dry matter content of flower litters in all of the species was ranked  
192 from 10% to 60%. Mixed leaf litter of alpine meadows were sampled on the Mt. Kaka  
193 (3950 m. a.s.l.), and leaf litters of 13 dominant species were also collected to compare  
194 their chemical properties with flower litters. Both types of litters were first spread on  
195 blotting paper for air drying. A small portion of each litter was further dried in an  
196 oven for 48 h to calculate dry matter content.

### 197 *Experimental design*

198 Polyvinyl chloride (PVC) pots (15 cm deep, 20 cm diameter at the top, and 12 cm  
199 diameter at the bottom) were filled with 2 kg of soils, which were collected in autumn  
200 of 2011. The collected soil samples were stored at 4 °C. The samples were sieved  
201 through were sieved through 2 mm mesh and then mixed thoroughly. The soil surface  
202 of each treatment was added with 5 g of flower litters or mixed litters (calculated as  
203 dry weight) on June 21 (14 species, earlier flowering plants) and Aug 11, 2012 (15  
204 species, later flowering plants). The surface was covered with a thin layer of soil to  
205 avoid being blown by wind. Other two additional treatments were conducted without  
206 litter addition (control) and with mixed leaf litter addition, respectively. In total, the  
207 pot experiment consisted of 33 treatments with three replicates, with a total number of  
208 99 pots. All of the pots were carefully buried 12 cm deep into the field to maintain the  
209 same soil temperature in the experimental field. The pots were randomly distributed,  
210 and their top edges were approximately 3 cm above the ground to prevent runoff from  
211 outside. All of the pots were rearranged every week to create a similar microclimate.  
212 After 50 days, each soil sample was collected from three points of each pot in the  
213 center and then mixed to avoid the boundary layer effect. Each soil sample from  
214 different PVC pots was mixed evenly by sieving through a 2 mm mesh respectively.  
215 The samples were stored and marked separately in an ice box prior to chemical  
216 determination.

217 *Decomposition rate*

218 A litter bag with a size of 14 cm × 20 cm was used to determine the  
219 decomposition rate of different plant litters. The bag was double faced and made from  
220 nylon net material with above (4.5 mm × 4.5 mm mesh) and below layers (0.8 mm ×  
221 0.8 mm mesh). The above layer with bigger mesh size allowed free access for most  
222 micro-arthropods, which dominate the soil fauna of alpine meadow in the eastern  
223 Tibetan Plateau, whereas the below layer with smaller mesh size can reduce litter  
224 spillage from the litter bags in the process. As representative species, flower litters of  
225 *R. przewalskii* and *M. integrifolia* and mixed litter were packed into litter bags with  
226 the edges sealed on June 21, 2012. The litterbag experiment was conducted to  
227 compare the decomposition rate of flower litters and mixed litter. Each treatment had  
228 eight replicates. After 7 weeks (August 8, 2012), litter was obtained from the litter  
229 bags and dried in an oven for decomposition calculation. Litter decomposition rates  
230 can be determined by the following equation.

231 
$$DR = (P-R)/P \times 100$$

232 where *DR* is the decomposition rate, *P* is primary litter mass in the litter bags, and *R*  
233 refers to residue litter before determining percentage mass loss.

234  
235 *Chemistry determination of soil and plant*

236 For soil samples, total dissolved N (TN) contents were determined using unsieved  
237 fresh moist soil subsamples. Soil subsamples were extracted using 2 M KCl and  
238 shaken for 1 h at room temperature (20 °C), with a soil-to-solution ratio of 1:5  
239 (weight/volume). The extracted solution was filtered through filter paper before  
240 further determination (Jones et al., 2004). NH<sub>4</sub><sup>+</sup>-N and NO<sub>3</sub><sup>-</sup>-N were analyzed with the  
241 indophenol blue colorimetric (Sah, 1994) and ultraviolet spectrophotometry methods  
242 (Norman et al., 1985), respectively. Dissolved organic nitrogen (DON) was calculated  
243 by subtracting dissolved inorganic N (NH<sub>4</sub><sup>+</sup>-N and NO<sub>3</sub><sup>-</sup>-N) from TN. Soil solutions  
244 were extracted by centrifugal drainage, whereas the exchangeable pool was extracted  
245 with 2 M KCl by using the methods reported by Jones et al. (2004). Total phosphorus  
246 (TP) and A-P in soils were estimated by extraction with 0.5 M sodium hydroxide



247 sodium carbonate solution (Dalal, 1973). Microbial biomass carbon (MBC) and  
248 microbial biomass nitrogen (MBN) contents were determined through the  
249 chloroform–fumigation direct-extraction technique. Correction factors of 0.54 for N  
250 and 0.45 for C were used to convert the chloroform labile N and C to microbial N and  
251 C (Brookes et al., 1985). For plant samples, the contents of C and N were determined  
252 by dry combustion with a CHNS auto-analyser system (Elementar Analysen systeme,  
253 Hanau, Germany) (Brodowski et al., 2006). The content of P was obtained  
254 colorimetrically by the chloro molybdophosphoric blue color method after wet  
255 digestion in a mixture of HNO<sub>3</sub>, H<sub>2</sub>SO<sub>4</sub>, and HClO<sub>4</sub> solution (Institute of Soil  
256 Academia Sinica, 1978). Lignin and cellulose were estimated by the method  
257 described by Melillo et al (1989).

### 258 *Data analysis*

259 One-way ANOVA was applied to compare values between the treatments and the  
260 control. Post-hoc multiple comparisons were adopted when the groups were three or  
261 more. Multivariate ANOVA was conducted to determine the effects of blooming time  
262 and different addition of litters and their interactions. To simplify the comparison of  
263 soil N and P between control (without flower litter) and the treated (with flower litter),  
264 we defined an index  $\alpha$  as:  $\alpha = \ln(N_2/N_1)$ .  $\alpha > 0$ ,  $N_2 > N_1$ ;  $\alpha < 0$ ,  $N_2 < N_1$ ;  $\alpha = 0$ ,  $N_2 =$   
265  $N_1$ .  $N_1$  is the control treatment without flower litter, and  $N_2$  indicated nutrition value  
266 (N or P) of flower litter treatment. Descriptive analysis was operated to demonstrate  
267  $\alpha$  values of different N and P fragments in various species litters addition treatment.  
268 The box plots provide the distribution of the values by the medians (central line), the  
269 quartiles 25% and 75% (box), and the ranges (whiskers) of ratios. Differences were  
270 tested at  $P < 0.05$  by using Tukey multiple range test in SPSS 19.0 software package  
271 (SPSS Inc., Chicago, IL, USA). The normality of data was tested with one-sample  
272 K-S test and Q-Q plot. Otherwise, log-transformation was adopted to meet the  
273 normality requirement. Homogeneity of variance test was also utilized during the  
274 analysis. In the figures and tables, information is presented as means and standard  
275 errors of means. All of the differences were tested at the  $P = 0.05$  level.

### 276 **Results**

277 **Flower litter production of dominant species and their biomass allocation**

278 Among 13 dominant species, the flower litters of phanerophyte plants, whose  
279 flower litters are comparable with non-flower litters, were calculated through  
280 comparison with non-flower litters during the flower litter collection (**Fig. 2 (a)**). The  
281 dry weights of flower litters were 10–40 g m<sup>-2</sup>, whereas their non-flower litters were  
282 only 5–25 g m<sup>-2</sup>. Although neither of the flower litters of *S. angustata* nor *R.*  
283 *capitatum* were significantly different compared with their non-flower litters ( $P >$   
284 0.05), the difference between the two remained noticeable, whose values were  $28.03 \pm$   
285  $3.56 \text{ g m}^{-2}$  versus  $13.21 \pm 1.49 \text{ g m}^{-2}$  for *R. capitatum* and  $19.58 \pm 3.50 \text{ g m}^{-2}$  versus  
286  $12.95 \pm 0.61 \text{ g m}^{-2}$  for *S. angustata*, respectively. The production of flower litters was  
287 higher than that of non-flower litters. The other three species significantly produced  
288 more flower litters than non-flower litters (*R. przewalskii*:  $F = 15.76$ ,  $P < 0.001$ ; *P.*  
289 *fruticosa*:  $F = 4.76$ ,  $P < 0.05$ ; *S. alpine*:  $F = 10.18$ ,  $P < 0.01$ ). The flower litters of the  
290 eight herbaceous species were compared with their individual aboveground biomass  
291 (**Fig. 2 (b)**), which ranked from 10% to nearly 40%. This finding indicated that flower  
292 litter should be considered to determine the effect of plants on soil nutrition pool  
293 during growing season.

294 **Comparison of chemical properties between flower and leaf litters**

295 Total C content was not significantly different between flower and leaf litters (**Fig. 3**  
296 **(a)**,  $F = 1.80$ ,  $P = 0.199$ ). However, the levels of cellulose, lignin, and structure C of  
297 leaf litter were significantly higher than those of flower litter ( $F = 6.74$ ,  $P < 0.05$ ;  $F =$   
298  $5.77$ ,  $P < 0.05$ ;  $F = 10.99$ ,  $P < 0.01$ ). Hence, flower litter probably contains more  
299 non-structure C than leaf litter.

300 Both N and P contents of flower litters were significantly higher than those of leaf  
301 litters (**Fig. 3 (b)**). N in flower litters was nearly doubled to that of leaf litter ( $23.17 \pm$   
302  $1.52$ ,  $11.87 \pm 0.77$ ;  $F = 45.70$ ,  $P < 0.001$ ). More than twice the amount of P were also  
303 present in flower litters compared with that in leaf litters ( $2.95 \pm 0.25$ ,  $1.12 \pm 0.12$ ;  $F$   
304  $= 43.87$ ,  $P < 0.001$ ).

305 For the implication of the ratio of different chemical properties, C/N, N/P, and  
306 lignin/N were determined to compare flower and leaf litters. All the three indicators of

307 leaf litter were significantly higher than those of flower litters (**Fig. 3 (c)**). As  
308 parameters used to demonstrate decomposition rate, C/N and lignin/N of leaf litter  
309 were nearly double to those of flower litter ( $39.27 \pm 4.16$ ,  $19.80 \pm 1.39$ ,  $F = 37.78$ ,  $P$   
310  $< 0.001$ ;  $21.09 \pm 2.25$ ,  $12.79 \pm 1.15$ ,  $F = 7.91$ ,  $P < 0.01$ ). Furthermore, N/P of flower  
311 litter was significantly higher than that of leaf litter ( $8.42 \pm 0.42$ ,  $11.60 \pm 0.56$ ;  $F =$   
312  $20.62$ ,  $P < 0.001$ ). These findings indicated that flower litter can supply more P per  
313 unit N than leaf litter.

#### 314 **Effects of flower litter on different fragments of soil N pool and P pool**

315 Earlier flowering species exerted positive effects on soil TN,  $\text{NO}_3^-$ -N, and  $\text{NH}_4^+$ -N  
316 (**Fig. 4 (a)**), with the addition of their flower litters according to their size of  $\alpha$  values.  
317 Most parameters were higher than 0, which indicated that  $N_2 > N_1$ . Flower litter  
318 increased soil N pool. All of the minimum  $\alpha$  values of five indices were also higher  
319 than 0 (**Table 2**, 0.42–1.29), which indicated that flower litter addition significantly  
320 increased different fragments in soil N pool ( $P < 0.001$ ). Among the later flowering  
321 species, except *G. sino-ornata* and *L. sinense*, soil N indices were significantly  
322 improved with flower litter addition, as demonstrated through  $\alpha$  values higher than 0  
323 (**Fig. 4 (b)**, **Table 2**). Later flowering species differed from earlier flowering species,  
324 with minimum  $\alpha$  values lower than 0, which resulted from the exceptions of *G.*  
325 *sino-ornata* and *L. sinense*. However, all of the mean  $\alpha$  values were higher than 0,  
326 which presented general results after flower litter addition (0.36–1.49). Different  
327 fragments of soil N pool were significantly enhanced only after 50 days ( $P < 0.001$ ).  
328 Interactions between flowering time and litter addition for  $\text{NO}_3^-$ -N, and  $\text{NH}_4^+$ -N were  
329 significant ( $F = 5.043$ ,  $P < 0.05$ ;  $F = 7.947$ ,  $P < 0.01$ ;  $F = 24.143$ ,  $P < 0.05$ ,  
330 respectively) but not for TN ( $F = 0.470$ ,  $P = 0.496$ ). Different flowering times  
331 significantly affected  $\text{NO}_3^-$ -N, and  $\text{NH}_4^+$ -N (**Table 3**,  $P < 0.01$ ) but did not  
332 significantly influences TN ( $F = 2.80$ ,  $P = 0.10$ ). As illustrated in **Fig. 4**, litter addition  
333 had significant effects on all of the N fragments, which was in accordance with the  
334 results in **Table 3**. The interaction of flowering time and litter addition exerted similar  
335 effects on different N fragments in soil with flowering time solely.

336 Flower litters exerted different effects on soil TP and A-P. Soil TP increased in

337 treatment with early flowering litters (**Fig. 4, Table 3**,  $F = 8.498$ ,  $P = 0.007$ ) but not in  
 338 later flowering litters. The minimum  $\alpha$  values were lower than 0 ( $-0.04$  and  $-0.20$ ,  
 339 respectively). However, A-P of both litter treatments was significantly positively  
 340 stimulated ( $F = 47.39$ ,  $P < 0.001$ ;  $F = 68.82$ ,  $P < 0.001$ ), whose  $\alpha$  values were both  
 341 higher than 0 ( $0.67-0.13$  and  $0.06-0.37$ , respectively). Multifactorial analysis  
 342 indicated that soil TP was not significantly different between treated with flower litter  
 343 and control in general (**Table 3**,  $F = 1.07$ ,  $P = 0.37$ ). No significant interaction was  
 344 evident between flowering time and litter addition treatments on soil TP ( $F = 0.01$ ,  $P$   
 345  $= 0.93$ ). Litter addition treatments alone only had a marginal significant effect on soil  
 346 TP ( $F = 3.17$ ,  $P = 0.08$ ). Moreover, both minimum  $\alpha$  values were lower than 0, but TP  
 347 was not significantly different between treatments with later flowering litters and  
 348 control treatment ( $F = 0.97$ ,  $P = 0.33$ ), which mainly resulted from *G. sino-ornata*, *L.*  
 349 *sinense*, and *C. lineare*. Nevertheless, A-P increased significantly after flower litter  
 350 addition ( $F = 43.01$ ,  $P < 0.001$ ), with a significant interaction between flowering time  
 351 and litter addition ( $F = 6.44$ ,  $P < 0.05$ ).

352 **Table 2**  $\alpha$  values of different N and P fragments in various species litters addition  
 353 treatment ( $n = 14$  and  $n = 15$  in earlier flowering species and later flowering species,  
 354 respectively).

| Flowering period  | Index                           | Mean | Std. Error | Minimum | Maximum | F      | P            |
|-------------------|---------------------------------|------|------------|---------|---------|--------|--------------|
| Earlier flowering | TN                              | 1.67 | 0.06       | 1.29    | 2.05    | 719.05 | <b>0.000</b> |
|                   | NO <sub>3</sub> <sup>-</sup> -N | 1.67 | 0.07       | 1.08    | 2.23    | 563.90 | <b>0.000</b> |
|                   | NH <sub>4</sub> <sup>+</sup> -N | 0.97 | 0.12       | 0.42    | 2.06    | 68.25  | <b>0.000</b> |
|                   | TP                              | 0.02 | 0.03       | -0.04   | 0.08    | 8.498  | <b>0.007</b> |
|                   | A-P                             | 0.31 | 0.17       | 0.67    | 0.13    | 47.39  | <b>0.000</b> |
| Later flowering   | TN                              | 1.29 | 0.21       | -0.37   | 2.40    | 38.37  | <b>0.000</b> |
|                   | NO <sub>3</sub> <sup>-</sup> -N | 1.11 | 0.18       | -0.75   | 1.55    | 37.77  | <b>0.000</b> |
|                   | NH <sub>4</sub> <sup>+</sup> -N | 0.36 | 0.05       | -0.09   | 0.72    | 60.64  | <b>0.000</b> |
|                   | TP                              | 0.03 | 0.11       | -0.20   | 0.12    | 0.97   | 0.33         |
|                   | A-P                             | 0.50 | 0.23       | 0.06    | 0.37    | 68.82  | <b>0.000</b> |

355

356

357 **Table 3** Multifactorial analysis of variance for the effects of flowering time, litter  
 358 addition, and their interactions on different N and P fragments.

| Source of variation                            | TN       |             | NO <sub>3</sub> <sup>-</sup> -N |             | NH <sub>4</sub> <sup>+</sup> -N |             | TP       |          | A-P      |             |
|------------------------------------------------|----------|-------------|---------------------------------|-------------|---------------------------------|-------------|----------|----------|----------|-------------|
|                                                | <i>F</i> | <i>P</i>    | <i>F</i>                        | <i>P</i>    | <i>F</i>                        | <i>P</i>    | <i>F</i> | <i>P</i> | <i>F</i> | <i>P</i>    |
| <i>Corrected Model</i>                         | 59.25    | <b>0.00</b> | 59.25                           | <b>0.00</b> | 54.07                           | <b>0.00</b> | 1.07     | 0.37     | 43.01    | <b>0.00</b> |
| Flowering time                                 | 2.80     | 0.10        | 2.80                            | 0.10        | 24.36                           | <b>0.00</b> | 0.02     | 0.90     | 6.44     | <b>0.01</b> |
| Litter addition treatments                     | 173.47   | <b>0.00</b> | 173.47                          | <b>0.00</b> | 117.00                          | <b>0.00</b> | 3.17     | 0.08     | 114.14   | <b>0.00</b> |
| Flowering time ×<br>Litter addition treatments | 2.80     | 0.10        | 2.80                            | 0.10        | 24.36                           | <b>0.00</b> | 0.02     | 0.90     | 6.44     | <b>0.01</b> |

359 Note: *P* values for significant effects and interactions are in bold.

360

361 **Effects of flower litter addition on soil solution N pool and soil MBC and MBN**

362 Soil solution N pool has been improved noticeably from 31.46 mg g<sup>-1</sup> to 47.35 mg g<sup>-1</sup>  
 363 in flower litter treatment compared with the control, particularly in fragment of  
 364 NO<sub>3</sub><sup>-</sup>-N, which has been greatly increased (from 30.93 mg g<sup>-1</sup> to 46.8 mg g<sup>-1</sup>). (**Table**  
 365 **4**). In mixed leaf litter treatment, there were no obvious variations after litter  
 366 decomposition, with 32.4 mg g<sup>-1</sup> NO<sub>3</sub><sup>-</sup>-N and 0.45 mg g<sup>-1</sup> NH<sub>4</sub><sup>+</sup>-N, respectively. There  
 367 were notable differences of both MBC and MBN between different treatments. Litter  
 368 addition not only increased soil microbial biomass C (102.05 mg kg<sup>-1</sup>, 68.08 mg kg<sup>-1</sup>,  
 369 and 46.25 mg kg<sup>-1</sup> for flower litter, mixed litter, and control, respectively) and MBN  
 370 (73.02 mg kg<sup>-1</sup>, 69.29 mg kg<sup>-1</sup>, 67.13 mg kg<sup>-1</sup> for flower litter, mixed litter, and  
 371 control, respectively) but also their C:N ratios (1.40, 0.98, and 0.69 for flower litter,  
 372 mixed litter, and control, respectively).

373 **Table 4** Comparing median value of soil solution pool and soil microbial biomass  
 374 between litter addition treated (flower litter and mixed leaf litter) and control.

| Treatments        | Soil solution N pool (mg g <sup>-1</sup> ) |                                 | Soil microbial biomass (mg kg <sup>-1</sup> ) |       |         |
|-------------------|--------------------------------------------|---------------------------------|-----------------------------------------------|-------|---------|
|                   | NO <sub>3</sub> <sup>-</sup> -N            | NH <sub>4</sub> <sup>+</sup> -N | MBC                                           | MBN   | MBC/MBN |
| Flower litter     | 46.8                                       | 0.55                            | 102.05                                        | 73.02 | 1.40    |
| Mixed leaf litter | 32.4                                       | 0.45                            | 68.08                                         | 69.29 | 0.98    |
| Control           | 30.93                                      | 0.53                            | 46.25                                         | 67.13 | 0.69    |

375

376 **Comparison of decomposition rate between flower litter and mixed leaf litter**

377 Two typical plant species, which are widely distributed and easily collected, were  
 378 assessed to compare the decomposition rate of flower litter and mixed litter.  
 379 Differences in decomposition rate among flower litter of two species and mixed litter

380 were supposed to be significant (**Fig. 5**,  $F = 130.34$ ,  $P < 0.001$ ). The flower litters of  
381 *R. przewalskii* and *M. integrifolia* decomposed greatly faster than mixed litter.  
382 However, within only 50 days, more than 20% of *R. przewalskii* and *M. integrifolia*  
383 flower litters decomposed, whereas the decomposition rate for mixed litter was  
384 approximately 6% (i.e., the former was nearly three times faster). Moreover, no  
385 significant differences were evident in the decomposition rates of the flower litter of *R.*  
386 *przewalskii* and *M. integrifolia* ( $P = 0.371$ ).

387

### 388 **Discussion**

389 Plant litter decomposition is a critical step in the formation of soil organic matter,  
390 mineralization of organic nutrients, and C balance in terrestrial ecosystems (Austin  
391 and Ballaré 2010). Species-specific variations in plant phenology can affect  
392 production of litter fall, which is noticeable during the growing season from the aspect  
393 of nutrient cycling although the peak of litter fall happens in autumn. Thus, the early  
394 litter fall of alpine plants during the study period from May to August can be a  
395 potential nutrient source when nutritional demands increase for rapid growth and  
396 development. In particular, the amount of flower fall in study area exceeds the leaf  
397 fall during the flowering season. A previous study indicated that reproductive litter  
398 production accounted for < 10% of the total litter in January–August and 13%–26% in  
399 September–December (Sanches et al., 2008), which was mainly triggered by rainfall  
400 variability that directly altered litter production dynamics and indirectly altered forest  
401 floor litter. In addition, the flowers are more nutritional than the leaves in terms of  
402 nutrients necessary for plant growth (Lee et al., 2011). In this study, summit  
403 production of flower litters are booming during special periods for both earlier  
404 flowering and later flowering species. Flower biomass of herbaceous plants accounts  
405 for 10% to approximately 40% of total aboveground biomass. Moreover, these flower  
406 litters produced considerably earlier than other aboveground litters that dropped at the  
407 end of growing season. Furthermore, flower litters and non-flower litters (mainly  
408 constituted of leaves) of woody plants were  $10\text{--}40\text{ g m}^{-2}$  and  $5\text{--}25\text{ g m}^{-2}$ , respectively,  
409 which clearly implies that flower litter can be a comparable decomposition substrate

410 in alpine ecosystems even for phanerophyte plants.

411 Litter production and decomposition are controlled by biological and physical  
412 processes, such as the activity and composition of soil and litter fauna and climate  
413 variations (Meentemeyer, 1978; Cornejo et al., 1994; Wieder and Wright, 1995; Aerts,  
414 1997; Cleveland et al., 2004). An integration of index or traits has been recommended  
415 to indicate process and rate of litter decomposition. Generally, tissues with high lignin,  
416 polyphenol, and wax contents and higher lignin:N and C:N ratios exhibit slow  
417 decomposition. The effect of litter quality on decomposition rates was extensively  
418 discussed in the literature, and C/N and lignin/N ratios have been commonly accepted  
419 as main explanatory factors (Melillo et al., 1982; Berg, 2000). Leaf litter with C/N  
420 ratios lower than 30 is known to decompose easily and yield a mull humus type,  
421 whereas C/N ratios above 30 result in N immobilization (Heal et al., 1997) and  
422 decomposition retardation. In the present study, flower litter had significantly less  
423 C/N ratio ( $19.80 \pm 1.39$ , less than 30) than leaf litter ( $39.27 \pm 4.16$ , more than 30).  
424 Lignin content in flower litters was significantly less than that in leaf litters ( $211.37 \pm$   
425  $8.63 \text{ mg kg}^{-1}$  and  $237.88 \pm 6.89 \text{ mg kg}^{-1}$ , respectively;  $F = 5.77$ ,  $P = 0.02$ ), similar to  
426 cellulose ( $266.93 \pm 4.92 \text{ mg kg}^{-1}$  and  $283.75 \pm 4.21 \text{ mg kg}^{-1}$ , respectively;  $F = 6.74$ ,  $P$   
427  $= 0.01$ ), which is one of the major cell-wall constituents. All of the results are in  
428 accordance with previous studies. Decomposition rate is negatively correlated with  
429 the concentration of lignin, which is a group of complex aromatic polymers that  
430 serves as a structural barrier impeding microbial access to labile C compounds (Swift  
431 et al., 1979; Taylor et al., 1989; Austin and Ballarín 2010; Talbot and Treseder, 2012).  
432 Moreover, greater non-structural carbohydrates existed in flower litters than those in  
433 other litters, as indicated by the absence of significant differences of total C content  
434 between flower litters and other litters. However, the structural carbohydrates of  
435 flower litters were significantly less than that of leaf litters. This finding can be  
436 inferred from the contents of lignin and cellulose (**Fig. 3 (a)**). Hence, flower litters  
437 can promote nutrients that easily complement soil (Parton et al., 2007) for plants in  
438 their whole life history. Decomposition rates of leaf litters have been considered  
439 recently from their lignin/N or lignin/cellulose (Talbot and Treseder, 2012; Cornwell

440 et al., 2008). Furthermore, in the present study, lignin/N was less in flower litters  
441 (almost 50% in leaf litters, i.e.,  $12.79 \pm 1.15$  and  $21.09 \pm 2.25$ , respectively), whereas  
442 N/P was higher than that of leaf litters.

443 A litterbag experiment was adopted and confirmed that the decay rates of flower  
444 litters were significantly faster than that of other litters, which is in accordance with  
445 the fast decomposition of *R. pseudoacacia* flower from an experiment performed in  
446 Korea (Lee et al., 2010). Flower litters contained significantly higher N and P  
447 contents than leaf litters (**Fig. 3 (b)**). Plant litter available to the decomposer  
448 community encompasses a broad range of issues that differ in chemical and physical  
449 properties (Swift et al., 1979). P has to be highlighted because it has been regarded as  
450 essential for a long time, which causes a limited attention on mechanisms that drive P  
451 limitation and their interactions with the N cycle (Vitousek et al., 2010). Although soil  
452 generally contains a large amount of total P, only a small proportion is immediately  
453 available for plant uptake from the soil solution. In most soils, the concentration of  
454 orthophosphate in solution is low (Richardson et al., 2009). P is derived mainly from  
455 rock weathering and related biogeochemical cycle, and ecosystems begin their  
456 existence with a fixed complement of P, and even very small losses cannot be readily  
457 replenished (Walker and Syers, 1976). The present study indicated that decomposition  
458 of flower litter can be one of the beneficial source of soil A-P in alpine ecosystems.  
459 Nevertheless, the current study regarding the characteristics and driven mechanism of  
460 this source remains at the first stage. Variation in soil physical-chemical properties,  
461 vegetation types, and microbial activities can significantly affect chemical  
462 compositions and forms and biological availability of soil P directly or indirectly.

463

464 Decay rates of different plant organs reflect the diversity that fruits decompose faster  
465 than leaves, which in turn decompose faster than woody plant parts (Swift et al., 1979;  
466 Kögel-Knabner, 2002). Flower litters decompose rapidly with higher N and P levels  
467 supplied to soil, particularly from  $\text{NO}_3^-$ -N in soil solution pool (**Table 4**). Histogram  
468 for  $\alpha$  values of DIN and A-P also presented soil available nutrients positively  
469 stimulated by flower litter (**Fig. 6**) for their values distributed at an interval greater



470 than 0. The high DOC values in flower litter may influence N and P in soil through C  
471 substrate supplement for soil microorganisms to enhance N immobilization. Recent  
472 empirical studies noted that the changing microbial community composition  
473 significantly affects ecosystem processes, such as litter decomposition (Strickland et  
474 al., 2009; Ramirez et al., 2012). Shifts from bacterial-dominated to fungal-dominated  
475 decomposition happened over short (days to a few months) periods (Poll et al., 2008;  
476 McMahon et al., 2005). Although the present study did not present the precise  
477 analysis of microbial community, both MBC and MBN differed greatly between  
478 different treatments (**Table 4**). Litter addition increased them obviously, which is  
479 evident not only in microbial biomass C and N but also in their C:N ratios (1.40, 0.98,  
480 and 0.69 for flower litter, mixed litter, and control, respectively). Therefore, microbial  
481 community composition varied depending on nutrient supplement from litters. Flower  
482 litter contains more than twice MBC (increased from 46.25 to 102.05); hence,  
483 microbial biomass and their activities enhance potentially.

484 Several unexpected species in the experiment reduced soil available nutrients  
485 probably because their specific chemical properties, which change as a result of  
486 microbial activities and nutrient dynamics (Karmarkar and Tabatabai, 1991), may  
487 negatively affect soil microorganism biomass or activities (Wardle et al., 1998,  
488 Cipollini et al., 2012). Furthermore, soil microbial communities can be modified  
489 through time in response to allelopathic plants with known or potential effects on  
490 plant communities (Cipollini et al., 2012, Inderjit and Weiner, 2001). Mineralization  
491 and nitrification can be subdued by inhibitory compounds from the exudates of a  
492 certain plant species, which come from a negative aspect and mainly result from  
493 suppression of related microbes (Cipollini et al., 2012). In another positive  
494 perspective, considering “*priming effect*” once flower litter is added in moderate  
495 treatments causes strong short-term changes in the turnover of soil organic matter and  
496 nutrient release follows litter decomposition (Jenkinson et al., 1985; Kuzyakov et al.,  
497 2000; Blagodatskaya and Kuzyakov, 2008). Hence, N and P availability in the soil of  
498 alpine ecosystem can be maintained in part by tissue chemistry favorable to microbial  
499 decomposition and release of nutrients.

500 This study provides evidence that plant species, through tissue chemistry, biomass  
501 allocation, and phenology, affect local soil properties in alpine ecosystem. Soil has  
502 specific susceptibility to decomposition of biochemical compounds in plant tissues,  
503 on a spectrum from quickly decomposed labile to relatively recalcitrant.  
504 Decomposition rates can be markedly affected by particle size, surface area, and mass  
505 characteristics (Angers and Recous, 1997). In addition, physical toughness (lignin, dry  
506 matter content, or C content) can be suitable predictors of decomposition across all of  
507 the organs. Structural (lignin, DMC) and chemical (N) traits together are proposed to  
508 be better predictors for several high-turnover organs than structural traits alone  
509 (Freschet et al., 2012). Flower litters have these intuitive benefits chemically and  
510 physically, but physical components of litter quality have received little attention in  
511 the research on litter quality. Future climate changes in temporal patterns are likely to  
512 have important direct and indirect consequences on litter dynamics as well as on  
513 phenology and decay process temporally and spatially. In brief, the question of the  
514 essentiality and fundamentality of litter decomposition, especially under natural  
515 conditions, remains unresolved although the key role of litter quality in decomposition  
516 and in ecosystem function is generally clear.

#### 517 **Acknowledgment**

518 This study was financially supported by the International Cooperation Project of  
519 Science and Technology Department of Sichuan Province (2014HH0056), China  
520 Postdoctoral Science Foundation (2014M552385), and National Natural Science  
521 Foundation of China (31400389). Authors would like to acknowledge the Key Lab of  
522 Ecological Restoration and Biodiversity Conservation of Sichuan (ECORES) for their  
523 support in laboratory facilities.

524

525 **References**

- 526 Aber JD, Melillo JM, Mcclaugherty CA (1990) Predicting Long-Term Patterns of  
527 Mass-Loss, Nitrogen Dynamics, and Soil Organic-Matter Formation from  
528 Initial Fine Litter Chemistry in Temperate Forest Ecosystems. *Can J Bot* 68:  
529 2201-2208
- 530 Aerts R (1997) Climate, leaf litter chemistry and leaf litter decomposition in terrestrial  
531 ecosystems: A triangular relationship. *Oikos* 79: 439-449
- 532 Angers, D.A., and Recous, S. (1997) Decomposition of wheat straw and rye residues  
533 as affected by particle size. *Plant Soil* 189: 197-203.
- 534 Arroyo MTK, Pacheco DA, Aguilera P (2013) Floral allocation at different altitudes  
535 in highly autogamous alpine *Chaetanthera euphrasioides* (Asteraceae) in the  
536 central Chilean Andes. *Alpine Bot* 123: 7-12
- 537 Austin AT, Marchesini VA (2012) Gregarious flowering and death of understorey  
538 bamboo slow litter decomposition and nitrogen turnover in a southern  
539 temperate forest in Patagonia, Argentina. *Funct Ecol* 26: 265-273
- 540 Berendse F, Aerts R (1987) Nitrogen-use-efficiency:A Biologically Meaningful  
541 Definition. *Funct Ecol* 1: 4
- 542 Berg B, Ekbohm G (1983) Nitrogen Immobilization in Decomposing Needle Litter at  
543 Variable Carbon - Nitrogen Ratios. *Ecology* 64: 63-67
- 544 Bielecki RL (1973) Phosphate Pools, Phosphate Transport, and Phosphate Availability.  
545 *Annu Rev Plant Phys* 24: 225-252
- 546 Brookes PC, Landman A, Pruden G, Jenkinson DS (1985) Chloroform fumigation and  
547 the release of soil nitrogen: a rapid direct extraction method to measure  
548 microbial biomass nitrogen in soil. *Soil Biol Biochem* 17: 837-842
- 549 Buxton DR, Marten GC (1989) Forage Quality of Plant-Parts of Perennial Grasses  
550 and Relationship to Phenology. *Crop Sci* 29: 429-435
- 551 Chapin FS, Vitousek PM, Vancleve K (1986) The Nature of Nutrient Limitation in  
552 Plant-Communities. *Am Nat* 127: 48-58
- 553 Chapin FS (2003) Effects of plant traits on ecosystem and regional processes: a  
554 conceptual framework for predicting the consequences of global change. *Ann*  
555 *Bot* 91: 455-463
- 556 Cleveland CC, Neff JC, Townsend AR, Hood E (2004) Composition, dynamics, and  
557 fate of leached dissolved organic matter in terrestrial ecosystems: Results from  
558 a decomposition experiment. *Ecosystems* 7: 275-285
- 559 Cornejo FH, Varela A, Wright SJ (1994) Tropical Forest Litter Decomposition under  
560 Seasonal Drought: Nutrient Release, Fungi and Bacteria -. *Oikos* 70: 183-190.
- 561 Dalal RC (1973) Estimation of Available Phosphorus in Soils by Extraction with  
562 Sodium Hydroxide Sodium Carbonate Solution. *J Aus Ins Agr Sci* 39: 142-143
- 563 Fabbro T, Korner C (2004) Altitudinal differences in flower traits and reproductive  
564 allocation. *Flora* 199: 70-81
- 565 Freschet GT, Aerts R, Cornelissen JHC (2012) A plant economics spectrum of litter  
566 decomposability. *Funct Ecol* 26: 56-65
- 567 Grime JP (1998) Benefits of plant diversity to ecosystems: immediate, filter and  
568 founder effects. *J Ecol* 86: 902-910

569 Groffman PM (1999) Carbon additions increase nitrogen availability in northern  
570 hardwood forest soils. *Biol Fertil Soils* 29: 430-433

571 Hautier Y, Randin CF, Stocklin J, Guisan A (2009) Changes in reproductive  
572 investment with altitude in an alpine plant. *J Plant Ecol-Uk* 2: 125-134

573 Haynes RJ (1986) *Mineral Nitrogen in the Plant-Soil System (Physiological Ecology)*.  
574 Academic Press Inc

575 Heal OW, Anderson JM, Swift MJ (1997) Plant litter quality and decomposition: an  
576 historical overview. In: Cadisch, G, Giller, KE eds. *Driven by nature. Plant*  
577 *litter quality and decomposition*. CAB International, Wallingford, pp 3-30

578 Inderjit, Weiner, J (2001) Plant allelochemical interference or soil chemical ecology?  
579 *Perspectives in Plant Ecology, Evolution and Systematics*, 4 (1): 3-12.

580 Jones DL, Shannon D, Murphy DV, Farrar J (2004) Role of dissolved organic  
581 nitrogen (DON) in soil N cycling in grassland soils. *Soil Biol Biochem* 36:  
582 749-756

583 Körner C (2003) *Alpine plant life : functional plant ecology of high mountain*  
584 *ecosystems*. 2nd edition. Springer, Berlin ; New York

585 Laungani R, Knops JMH (2009) Species-driven changes in nitrogen cycling can  
586 provide a mechanism for plant invasions. *Proc Natl Acad Sci USA* 106:  
587 12400-12405

588 Lee YC, Nam JM, Kim JG (2011) The influence of black locust (*Robinia*  
589 *pseudoacacia*) flower and leaf fall on soil phosphate. *Plant Soil* 341: 269-277

590 MacLean DA and Wein RW (1978) Litter production and forest floor nutrient  
591 dynamics in pine and hardwood stands of New Brunswick, Canada.  
592 *Ecography* 1: 1-15

593 Meentemeyer V (1978) Macroclimate and Lignin Control of Litter Decomposition  
594 Rates. *Ecology* 59: 465-472

595 Melillo JM, Aber JD, Muratore JF (1982) Nitrogen and Lignin Control of Hardwood  
596 Leaf Litter Decomposition Dynamics. *Ecology* 63: 621-626

597 Melillo, J.M., Aber, J.D., Linkins, A.E., Ricca, A., Fry, B. and Nadelhoffer, K.J.,  
598 (1989) Carbon and nitrogen dynamics along the decay continuum: plant litter  
599 to soil organic matter. *Plant and Soil* 115, 189-198.

600 Muller-Landau, H.C. and Wright, S.J. (2010). Litterfall Monitoring Protocol

601 Nilsson C, Xiong SJ, Johansson ME, Vought LBM (1999) Effects of leaf-litter  
602 accumulation on riparian plant diversity across Europe. *Ecology* 80:  
603 1770-1775

604 Norman RJ, Edberg JC, Stucki JW (1985) Determination of Nitrate in Soil Extracts by  
605 Dual-wavelength Ultraviolet Spectrophotometry. *Soil Sci Soc Am J* 49:  
606 1182-1185

607 Qiu LP, Zhang XC, Cheng JM, Yin XQ (2010) Effects of black locust (*Robinia*  
608 *pseudoacacia*) on soil properties in the loessial gully region of the Loess  
609 Plateau, China. *Plant Soil* 332: 207-217

610 Richardson AE, Barea JM, McNeill AM, Prigent-Combaret C (2009) Acquisition of  
611 phosphorus and nitrogen in the rhizosphere and plant growth promotion by  
612 microorganisms. *Plant Soil* 321: 305-339

613 Sah RN (1994) Nitrate-Nitrogen Determination-A Critical Review. *Commun Soil Sci*  
614 *Plan* 25: 2841-2869

615 Sanches L, Valentini CMA, Pinto OB, Nogueira JD, Vourlitis GL, Biudes MS, da  
616 Silva CJ, Bambi P, Lobo FD (2008) Seasonal and interannual litter dynamics  
617 of a tropical semideciduous forest of the southern Amazon Basin, Brazil. *J*  
618 *Geophys Res-Bioge* 113:

619 Scott NA, Cole CV, Elliott ET, Huffman SA (1996) Soil textural control on  
620 decomposition and soil organic matter dynamics. *Soil Sci Soc Am J* 60:  
621 1102-1109

622 Stock WD, Dlamini TS, Cowling RM (1999) Plant induced fertile islands as possible  
623 indicators of desertification in a succulent desert ecosystem in northern  
624 Namaqualand, South Africa. *Plant Ecol.* 142: 161-167

625 Stohlgren TJ (1988) Litter dynamics in two Sierran mixed conifer forests. II.  
626 Nutrient release in decomposing leaf litter. *Can J For Res* 18:1136-1144

627 Sun Geng, Luo Peng, Wu Ning, Qiu Pengfei, Gao Yongheng, Chen Huai, Shi Fusun  
628 (2009) *Stellera chamaejasme* L. increases soil N availability and supply rates  
629 and microbial biomass in an alpine meadow ecosystem on the eastern Tibetan  
630 Plateau of China, *Soil Biol Biochem.* 41, 86-91

631 Vitousek PM, Howarth RW (1991) Nitrogen Limitation on Land and in the Sea - How  
632 Can It Occur. *Biogeochemistry* 13: 87-115

633 Wieder RK, Wright SJ (1995) Tropical Forest Litter Dynamics and Dry Season  
634 Irrigation on Barro-Colorado Island, Panama. *Ecology* 76: 1971-1979

635 Wookey PA, Aerts R, Bardgett RD, Baptist F, Brathen KA, Cornelissen JHC, Gough L,  
636 Hartley IP, Hopkins DW, Lavorel S, Shaver GR (2009) Ecosystem feedbacks  
637 and cascade processes: understanding their role in the responses of Arctic and  
638 alpine ecosystems to environmental change. *Glob Chang Biol* 15: 1153-1172

639 Xiong SJ, Nilsson C (1999) The effects of plant litter on vegetation: a meta-analysis. *J*  
640 *Ecol* 87: 984-994

641 Yavitt JB, Fahey TJ (1986) Litter Decay and Leaching from the Forest Floor in  
642 *Pinus-Contorta* (*Lodgepole Pine*) Ecosystems. *J Ecol* 74: 525-545

643

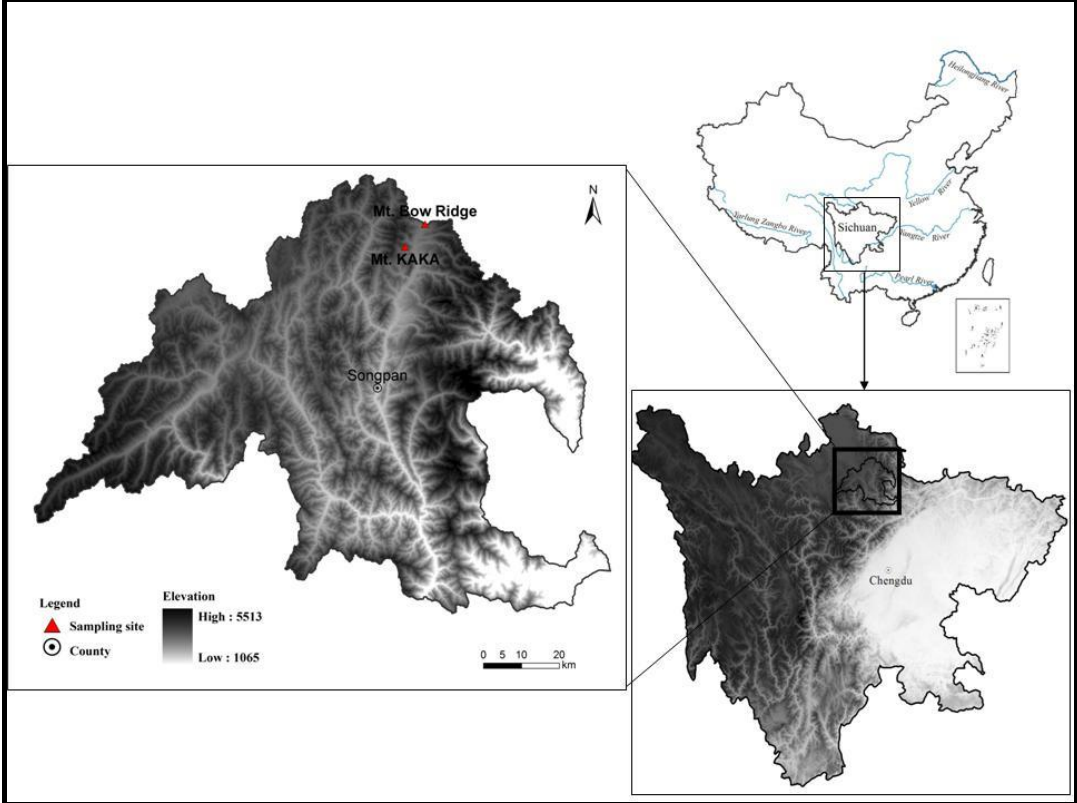

645

646 **Fig. 1** Location of the study sites.

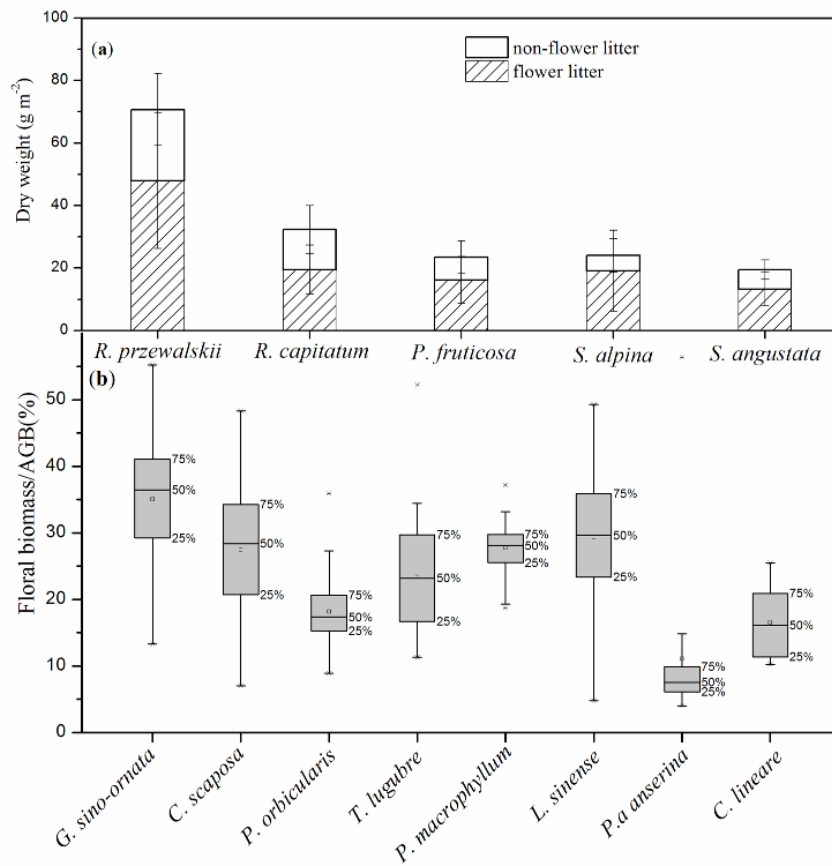

647

648 **Fig. 2** Production of flower litters and biomass allocation of representative dominant  
 649 species. (a) Production of flower litters and non-flower litters of shrubs  
 650 (phaenophyte) per unit area (m<sup>2</sup>); and (b) floral biomasses and their allocation in the  
 651 aboveground biomass.

652

653

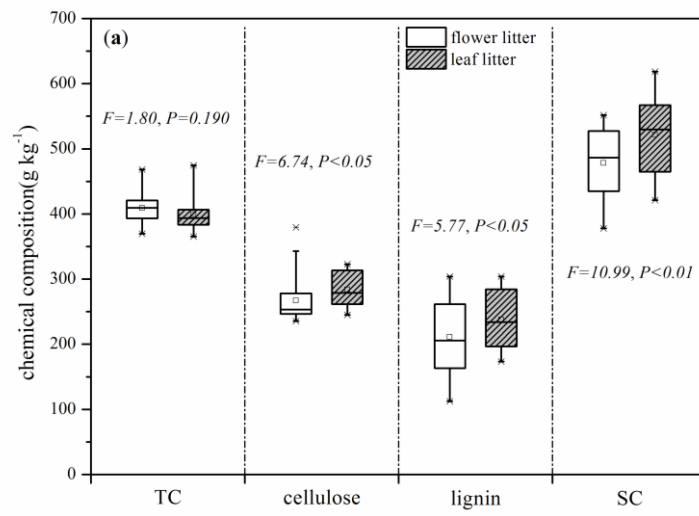

654

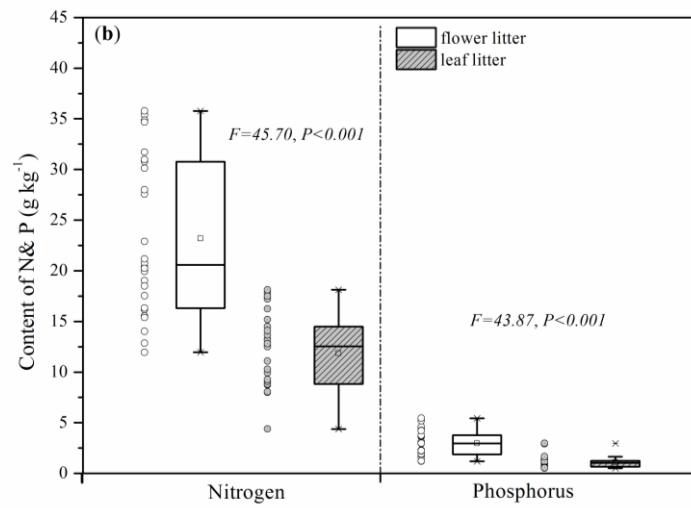

655

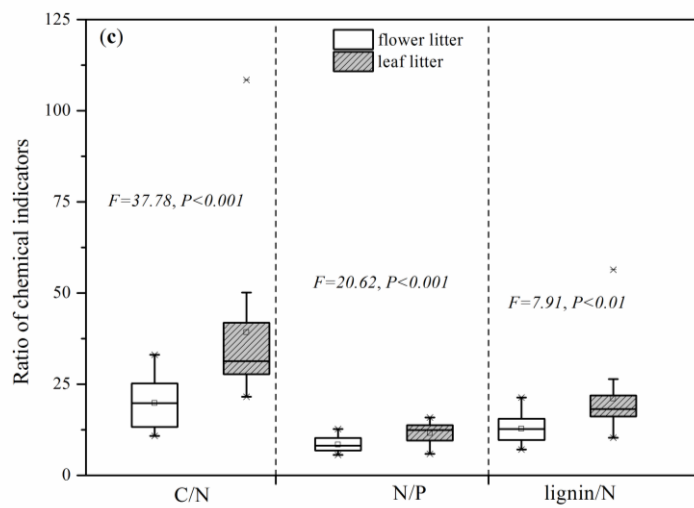

656

657

658

**Fig. 3** Chemical composition and their comparison between flower and leaf litters.



659  
660  
661

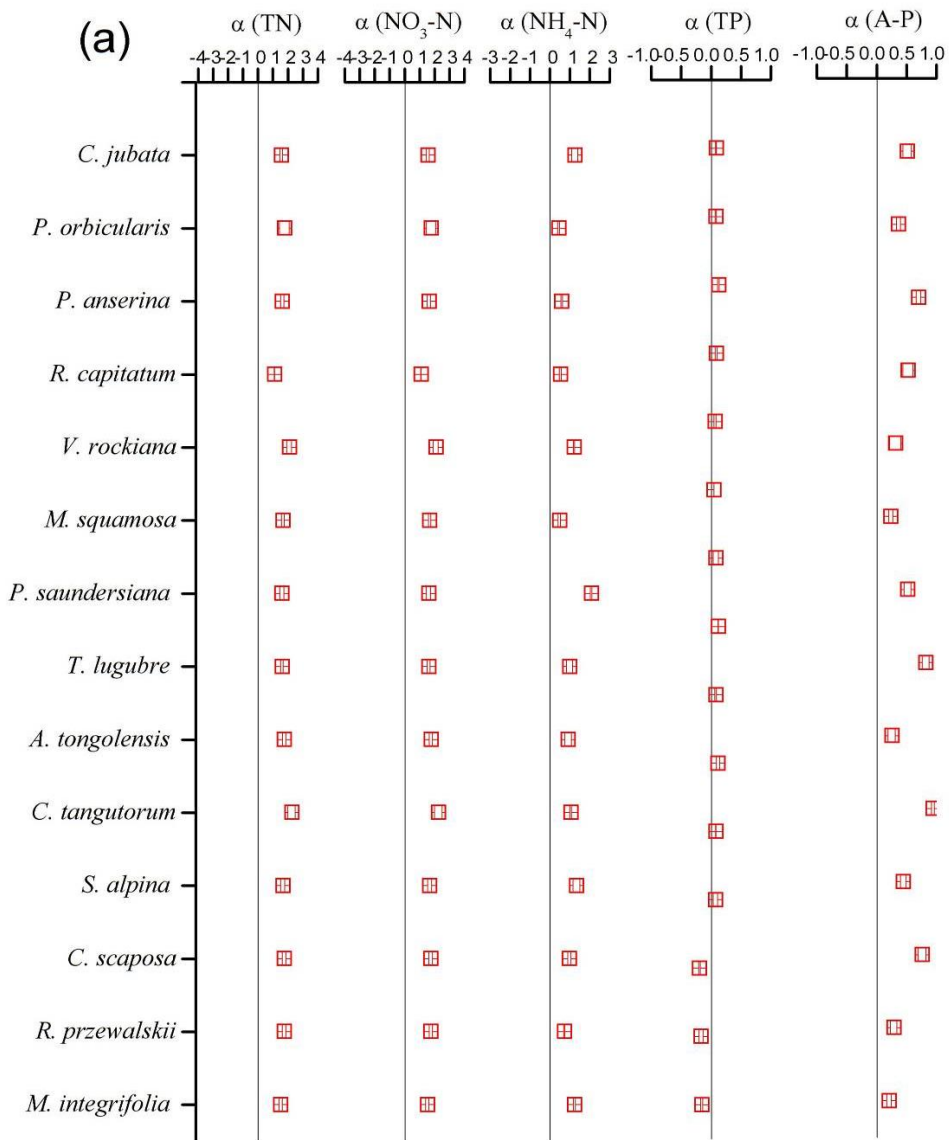

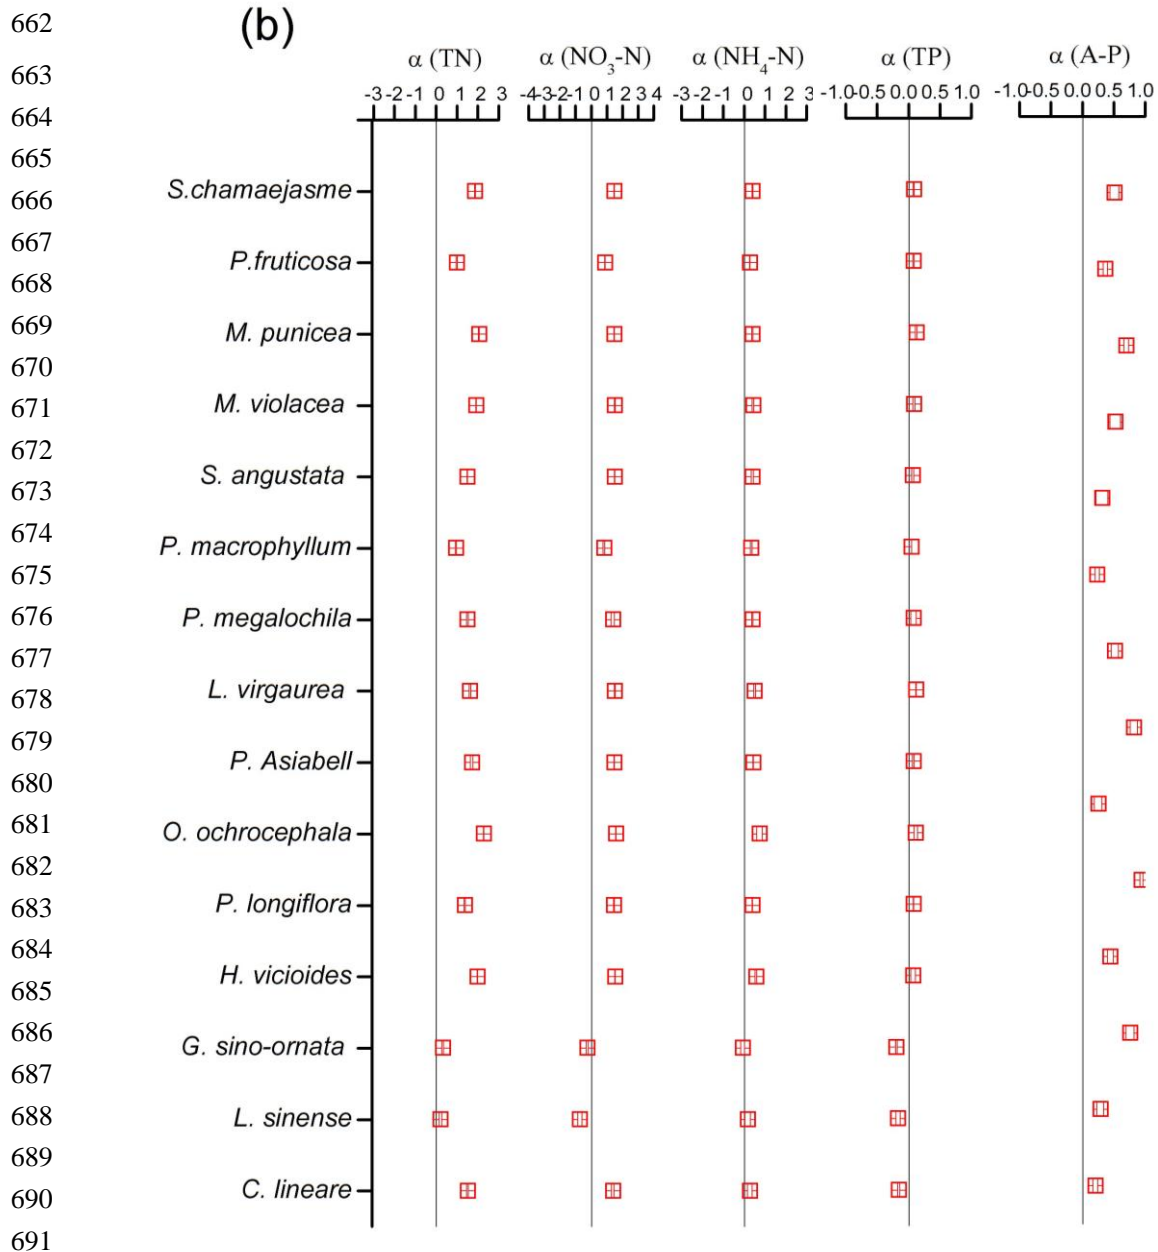

691

692 **Fig. 4** Variation in soil N pool and P pool after addition of flower litters, (a) earlier

693 flowering species, and (b) later flowering species.

694

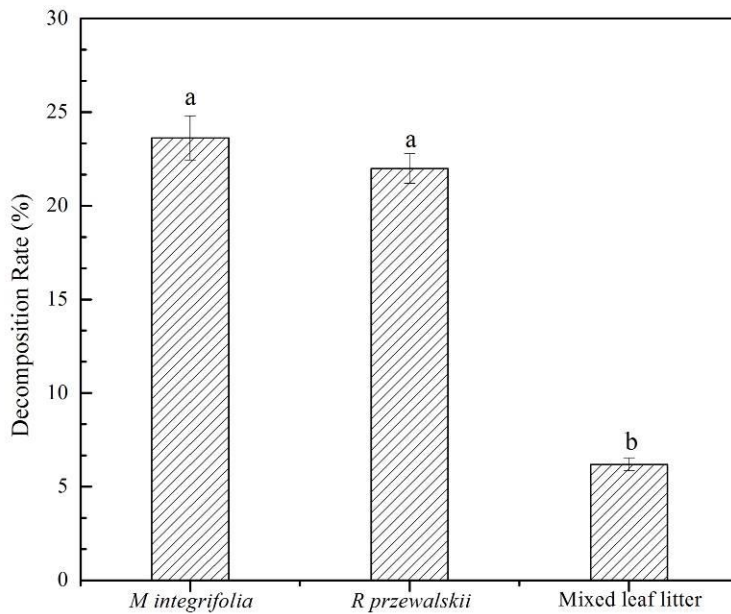

696

697 **Fig. 5** Percentage of decomposed dry mass of *M. integrifolia* and *R. przewalskii* in a  
 698 50-day litter-bag study. Column represents mean, and bar indicates Standard Error (n  
 699 = 8). Different lowercase letters indicate significant differences of decomposition rate  
 700 between litter materials.

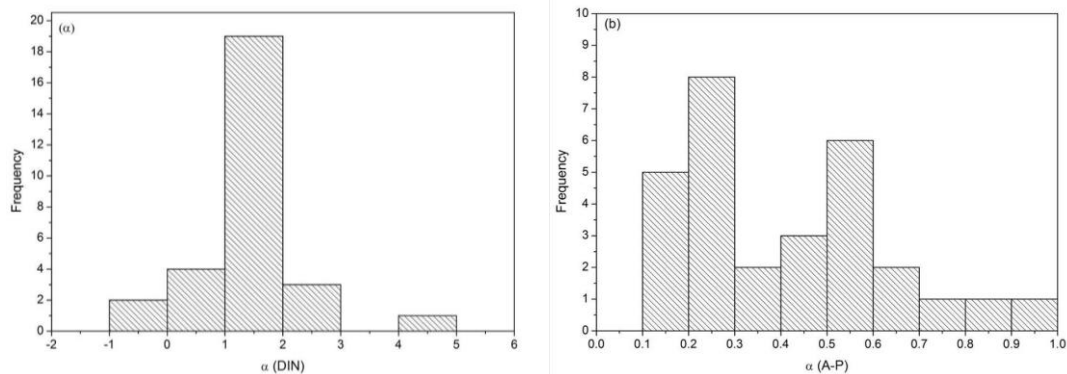

701

702 **Fig. 6** Variation in soil nutrition pool with flower litters addition. Histogram for  $\alpha$   
 703 values of DIN (a) and A-P (b) indicates the change between treatments and control.

704
